# Supplementary material for: The Removal of Arsenic and Its Inorganic Forms from Marine Algae—A Base for Inexpensive and Efficient Fertilizers
Source: MDPI journal article supplement (doi:10.3390/molecules29061348), 2024-03-18
Supplement: s1 [file s1]

# Removal of Arsenic and Its Inorganic Forms from Marine Algae—A Base for Inexpensive and Efficient Fertilizers

**Table S1** Comparison of studied material with literature data regarding specific surface area and As(III)/As(V) adsorption performance

| Material symbol                    | S <sub>BET</sub><br>[m <sup>2</sup> g <sup>-1</sup> ] | As(III) adsorption parameters                                                                    | As(V) adsorption parameters                                                                     | Literature |
|------------------------------------|-------------------------------------------------------|--------------------------------------------------------------------------------------------------|-------------------------------------------------------------------------------------------------|------------|
| Hydroxyl-enriched CeO <sub>2</sub> | -                                                     | pH <sub>0</sub> = 3, t <sub>eq</sub> = 40 min,<br>A <sub>max</sub> = 65.41 mg g <sup>-1</sup>    | pH <sub>0</sub> = 2, t <sub>eq</sub> = 50 min,<br>A <sub>max</sub> = 71.91 mg g <sup>-1</sup>   | [1]        |
| Nano-CeO <sub>2</sub> aggregates   | 111                                                   | pH <sub>0</sub> = 3, t <sub>eq</sub> = 60 min                                                    | -                                                                                               | [2]        |
| Hydrous CeO <sub>2</sub> NPs       | 198                                                   | pH <sub>0</sub> = 7, t <sub>eq</sub> = 120 min,<br>A <sub>max</sub> = 170 mg g <sup>-1</sup>     | pH <sub>0</sub> = 7, t <sub>eq</sub> = 120 min,<br>A <sub>max</sub> = 107 mg g <sup>-1</sup>    | [3]        |
| Engineered CeO <sub>2</sub> NPs    | 17                                                    | pH <sub>0</sub> = 3.6, t <sub>eq</sub> = 4320 min,<br>A <sub>max</sub> = 33.8 mg g <sup>-1</sup> | pH <sub>0</sub> = 3.6, t <sub>eq</sub> = 4320 min,<br>A <sub>max</sub> = 8.9 mg g <sup>-1</sup> | [4]        |
| UiO-66-SH-A                        | 30                                                    | pH <sub>0</sub> = 9, t <sub>eq</sub> = 30 min,<br>A <sub>max</sub> = 90.7 mg g <sup>-1</sup>     | pH <sub>0</sub> = 11, t <sub>eq</sub> = 30 min,<br>A <sub>max</sub> = 98.8 mg g <sup>-1</sup>   | [5]        |
| ZCNs                               | -                                                     | pH <sub>0</sub> = 6, t <sub>eq</sub> = 25 min,<br>A <sub>max</sub> = 28.61 mg g <sup>-1</sup>    | pH <sub>0</sub> = 6, t <sub>eq</sub> = 20 min,<br>A <sub>max</sub> = 106.57 mg g <sup>-1</sup>  | [6]        |
| CeO <sub>2</sub>                   | 187                                                   | pH <sub>0</sub> = 4, t <sub>eq</sub> = 600 min,<br>A <sub>max</sub> = 96.1 mg g <sup>-1</sup>    | pH <sub>0</sub> = 4, t <sub>eq</sub> = 600 min,<br>A <sub>max</sub> = 68.5 mg g <sup>-1</sup>   | This work  |

- [1] Hu W., Yang L.,\* Shao P. et al. Proton Self-Enhanced Hydroxyl-Enriched Cerium Oxide for Effective Arsenic Extraction from Strongly Acidic Wastewater, *Environ. Sci. Technol.*, **2022**, 56, 10412–10422, doi: 10.1021/acs.est.2c02675.
- [2] Pang J.-H., Liu Y., Li J. et al. Solvothermal synthesis of nano-CeO<sub>2</sub> aggregates and its application as a high-efficient arsenic adsorbent, *Rare Met.*, **2019**, 38, 73–80, doi: 10.1007/s12598-018-1072-4.
- [3] Li R., Li Q., Gao S. et al. Exceptional arsenic adsorption performance of hydrous cerium oxide nanoparticles: Part A. Adsorption capacity and mechanism, *Chem. Eng. J.*, **2012**, 185–186, 127–135, doi: 10.1016/j.cej.2012.01.061.
- [4] Bi X., Zeng C. and Westerhoff P. Adsorption of Arsenic Ions Transforms Surface Reactivity of Engineered Cerium Oxide Nanoparticles, *Environ. Sci. Technol.*, **2020**, 54, 9437–9444, doi: 10.1021/acs.est.0c02781.
- [5] Shao P., Ding L., Luo J. et al. Lattice-Defect-Enhanced Adsorption of Arsenic on Zirconia Nanospheres: A Combined Experimental and Theoretical Study, *ACS Appl. Mater. Interfaces*, **2019**, 11, 29736–29745, doi: 10.1021/acsami.9b06041.
- [6] Luo J., Luo X., Hu C. et al. Zirconia (ZrO<sub>2</sub>) Embedded in Carbon Nanowires via Electrospinning for Efficient Arsenic Removal from Water Combined with DFT Studies, *ACS Appl. Mater. Interfaces*, **2016**, 8, 18912–18921, doi: 10.1021/acsami.6b06046.

**Table S2** Elemental composition of studied algae and BCR-279 before water extraction and elemental content extracted by water from these samples (\* - mean value from 4 repeats, # - standard deviation from 4 repeats, LOD [mg kg<sup>-1</sup>]: Cd (0.02), Pb (2.0), Se (4.0))

| Element | Total content<br>[mg kg <sup>-1</sup> ] |                          |                          |                          | Content extracted by water<br>[mg kg <sup>-1</sup> ] |                          |                          |                          |
|---------|-----------------------------------------|--------------------------|--------------------------|--------------------------|------------------------------------------------------|--------------------------|--------------------------|--------------------------|
|         | Sample 1                                | Sample 2                 | Sample 3                 | BCR 279                  | Sample 1                                             | Sample 2                 | Sample 3                 | BCR 279                  |
| Al      | 307*±17 <sup>#</sup>                    | 263*±8 <sup>#</sup>      | 176*±23 <sup>#</sup>     | 1465*±66 <sup>#</sup>    | 6.86*±0.52 <sup>#</sup>                              | 4.61*±0.35 <sup>#</sup>  | 4.05*±0.30 <sup>#</sup>  | 1.88*±0.14 <sup>#</sup>  |
| As      | 34.3*±0.4 <sup>#</sup>                  | 55.5*±0.2 <sup>#</sup>   | 58.9*±0.8 <sup>#</sup>   | 3.10*±0.12 <sup>#</sup>  | 21.6*±1.6 <sup>#</sup>                               | 35.2*±2.6 <sup>#</sup>   | 40.5*±3.1 <sup>#</sup>   | 0.75*±0.03 <sup>#</sup>  |
| B       | 109*±1 <sup>#</sup>                     | 118*±1 <sup>#</sup>      | 115*±1 <sup>#</sup>      | 60.1*±0.9 <sup>#</sup>   | 87.4*±6.5 <sup>#</sup>                               | 21.2*±1.6 <sup>#</sup>   | 85.6*±6.4 <sup>#</sup>   | 44.0*±3.3 <sup>#</sup>   |
| Ca      | 9873*±102 <sup>#</sup>                  | 9795*±151 <sup>#</sup>   | 2714*±82 <sup>#</sup>    | 26,626*±144 <sup>#</sup> | 1289*±96 <sup>#</sup>                                | 1654*±124 <sup>#</sup>   | 1350*±101 <sup>#</sup>   | 1704*±127 <sup>#</sup>   |
| Cd      | 0.18*±0.01 <sup>#</sup>                 | 0.52*±0.01 <sup>#</sup>  | 0.46*±0.03 <sup>#</sup>  | <LOD                     | <LOD                                                 | 0.17*±0.02 <sup>#</sup>  | 0.06*±0.01 <sup>#</sup>  | <LOD                     |
| Cr      | 23.0*±1.3 <sup>#</sup>                  | 1.88*±0.09 <sup>#</sup>  | 1.70*±0.3 <sup>#</sup>   | 6.97*±0.12 <sup>#</sup>  | 0.28*±0.02 <sup>#</sup>                              | 0.15*±0.01 <sup>#</sup>  | 0.17*±0.01 <sup>#</sup>  | 0.09*±0.01 <sup>#</sup>  |
| Cu      | 1.18*±0.02 <sup>#</sup>                 | 1.41*±0.02 <sup>#</sup>  | 1.13*±0.03 <sup>#</sup>  | 11.8*±0.1 <sup>#</sup>   | 0.27*±0.02 <sup>#</sup>                              | 0.27*±0.02 <sup>#</sup>  | 0.21*±0.01 <sup>#</sup>  | 3.56*±0.03 <sup>#</sup>  |
| Fe      | 565*±6 <sup>#</sup>                     | 517*±1 <sup>#</sup>      | 277*±17 <sup>#</sup>     | 2086*±26 <sup>#</sup>    | 22.0*±1.5 <sup>#</sup>                               | 23.3*±1.4 <sup>#</sup>   | 12.6*±1.0 <sup>#</sup>   | 15.6*±1.1 <sup>#</sup>   |
| K       | 20,958*±324 <sup>#</sup>                | 31,509*±315 <sup>#</sup> | 34,792*±107 <sup>#</sup> | 11,234*±128 <sup>#</sup> | 13,285*±723 <sup>#</sup>                             | 24,257*±996 <sup>#</sup> | 24,811*±820 <sup>#</sup> | 8926*±569 <sup>#</sup>   |
| Mg      | 7493*±84 <sup>#</sup>                   | 6556*±84 <sup>#</sup>    | 6806*±22 <sup>#</sup>    | 12,957*±66 <sup>#</sup>  | 2363*±108 <sup>#</sup>                               | 3128*±96 <sup>#</sup>    | 2670*±82 <sup>#</sup>    | 5412*±115 <sup>#</sup>   |
| Mn      | 23.6*±0.2 <sup>#</sup>                  | 66.6*±0.3 <sup>#</sup>   | 49.6*±1.4 <sup>#</sup>   | 1860*±93 <sup>#</sup>    | 6.45*±0.45 <sup>#</sup>                              | 18.9*±1.4 <sup>#</sup>   | 15.0*±1.2 <sup>#</sup>   | 239*±15 <sup>#</sup>     |
| Na      | 22,916*±324 <sup>#</sup>                | 23,764*±340 <sup>#</sup> | 22,110*±182 <sup>#</sup> | 16,077*±91 <sup>#</sup>  | 15,455*±243 <sup>#</sup>                             | 18,802*±305 <sup>#</sup> | 16,748*±358 <sup>#</sup> | 13,385*±385 <sup>#</sup> |
| Ni      | 3.17*±0.05 <sup>#</sup>                 | 3.62*±0.06 <sup>#</sup>  | 2.99*±0.19 <sup>#</sup>  | 12.4*±0.3 <sup>#</sup>   | 0.47*±0.03 <sup>#</sup>                              | 0.80*±0.06 <sup>#</sup>  | 0.76*±0.05 <sup>#</sup>  | 3.57*±0.23 <sup>#</sup>  |
| P       | 370*±6 <sup>#</sup>                     | 687*±1 <sup>#</sup>      | 986*±7 <sup>#</sup>      | 1825*±14 <sup>#</sup>    | 220*±14 <sup>#</sup>                                 | 428*±28 <sup>#</sup>     | 639*±35 <sup>#</sup>     | 974*±61 <sup>#</sup>     |
| Pb      | <LOD                                    | <LOD                     | <LOD                     | 9.53*±0.09 <sup>#</sup>  | <LOD                                                 | <LOD                     | <LOD                     | <LOD                     |
| S       | 21,265*±258 <sup>#</sup>                | 13,580*±197 <sup>#</sup> | 19,960*±222 <sup>#</sup> | 29883*±78 <sup>#</sup>   | 6192*±364 <sup>#</sup>                               | 6228*±305 <sup>#</sup>   | 7350*±426 <sup>#</sup>   | 15,155*±912 <sup>#</sup> |
| Se      | <LOD                                    | <LOD                     | <LOD                     | <LOD                     | <LOD                                                 | <LOD                     | <LOD                     | <LOD                     |
| Zn      | 22.8*±0.3 <sup>#</sup>                  | 20.6*±0.1 <sup>#</sup>   | 27.6*±0.9 <sup>#</sup>   | 41.5*±0.5 <sup>#</sup>   | 10.7*±0.5 <sup>#</sup>                               | 4.79*±0.3 <sup>#</sup>   | 10.6*±0.6 <sup>#</sup>   | 3.35*±0.18 <sup>#</sup>  |
